# Supplementary material for: Severe experimental folate deficiency in a human subject – a longitudinal study of biochemical and haematological responses as megaloblastic anaemia develops
Source: PubMed Central journal article supplement (PMC4190280; doi:10.1186/2193-1801-3-442), 2014-09-23
Supplement: 40064_2014_1258_MOESM3_ESM.pdf [file 40064_2014_1258_MOESM3_ESM.pdf]

### A Folate intake

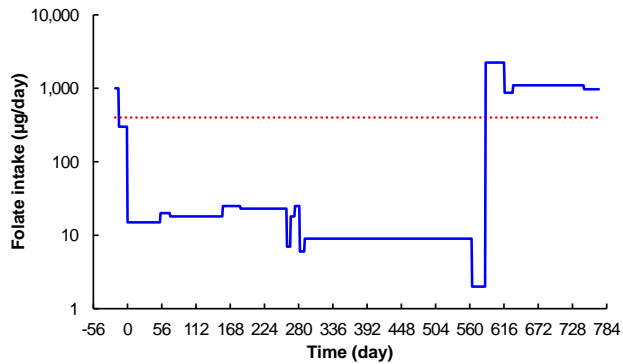

### B Energy intake

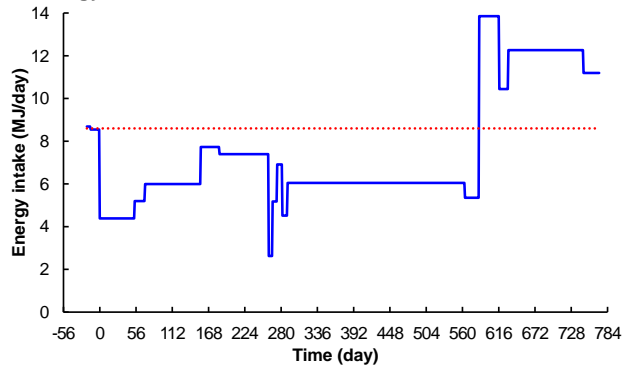

### C Weight

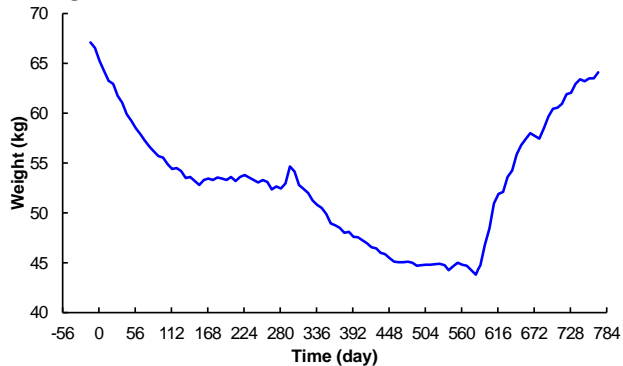

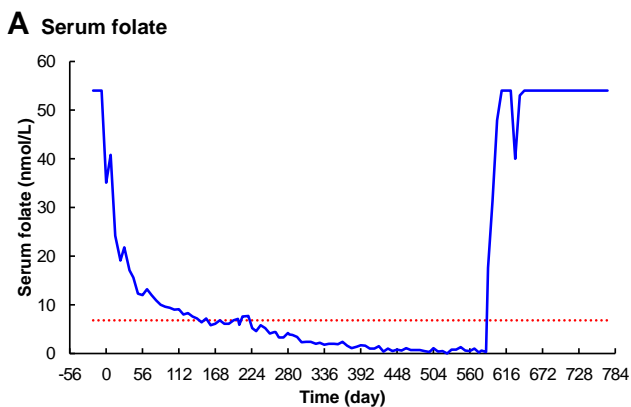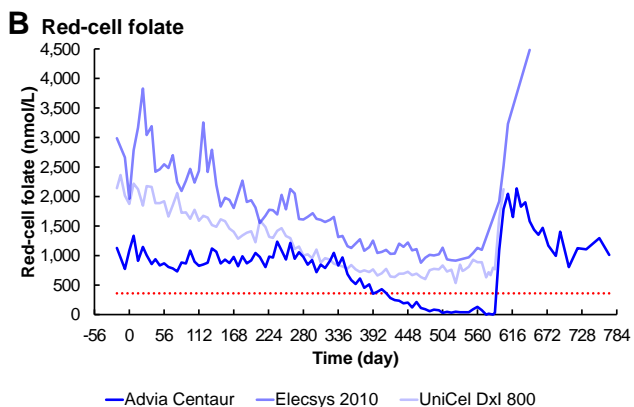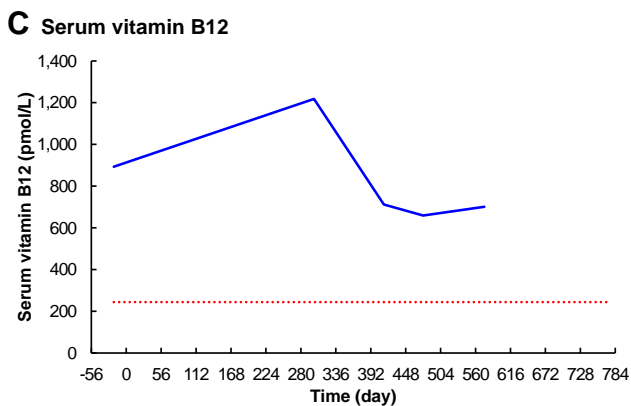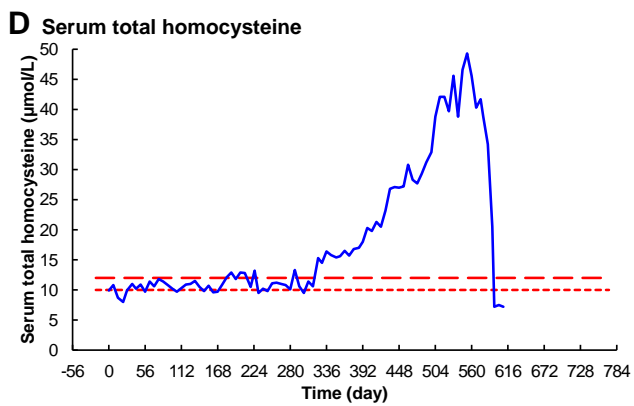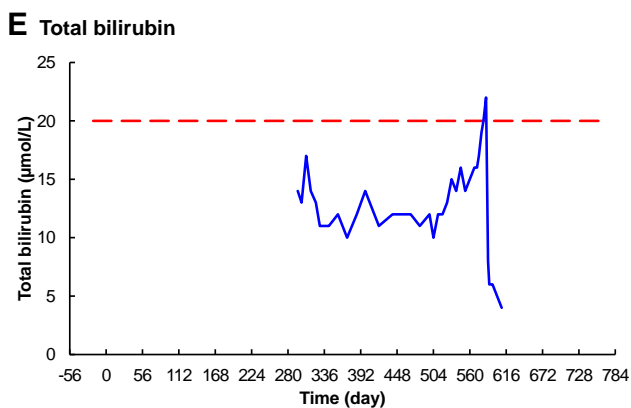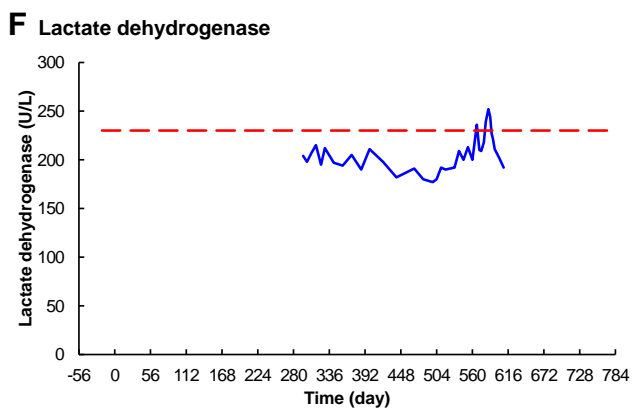

**A** Haemoglobin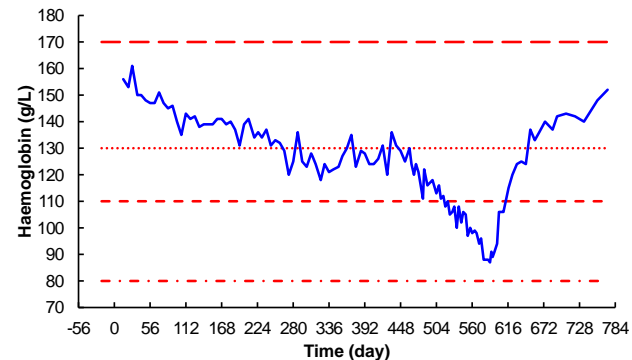**B** Red-cell count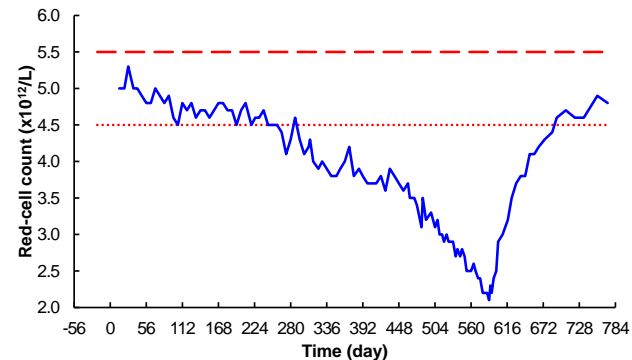**C** Haematocrit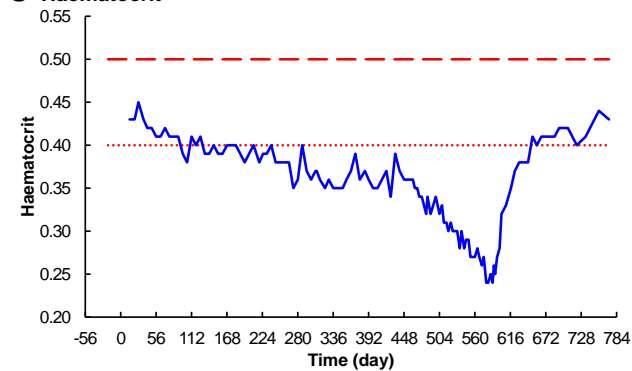**D** Mean cell volume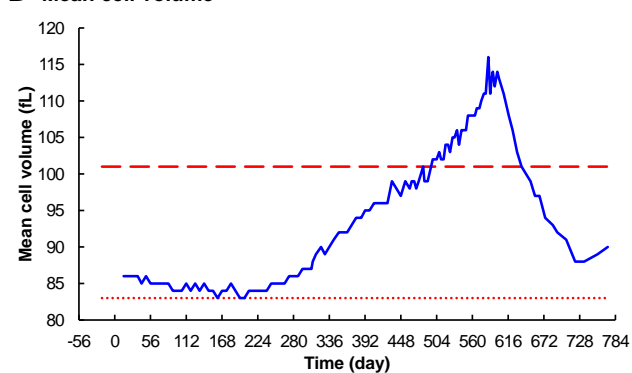**E** Red-cell distribution width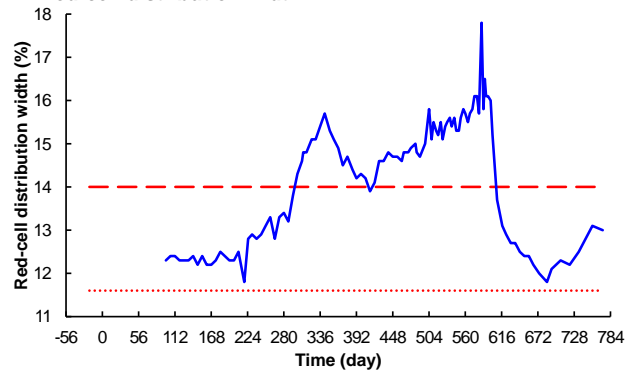**F** Mean cell haemoglobin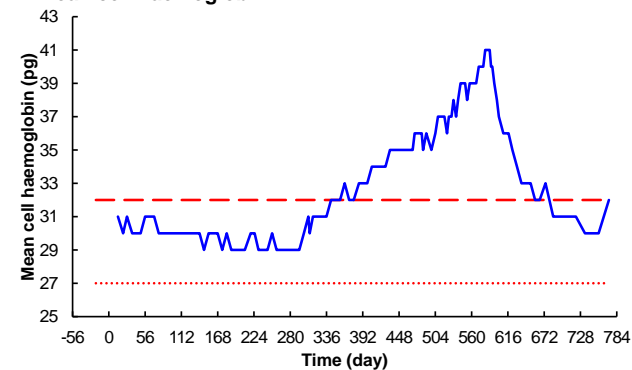

**A Reticulocyte count**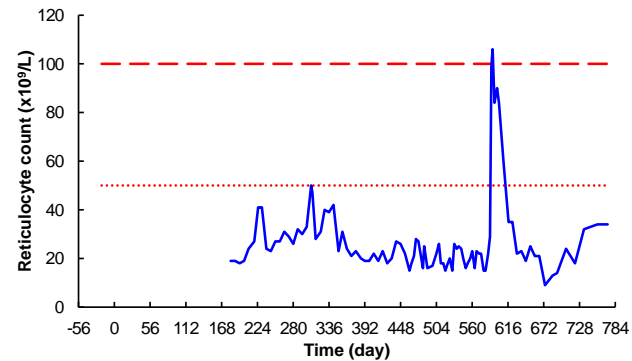**B Platelet count**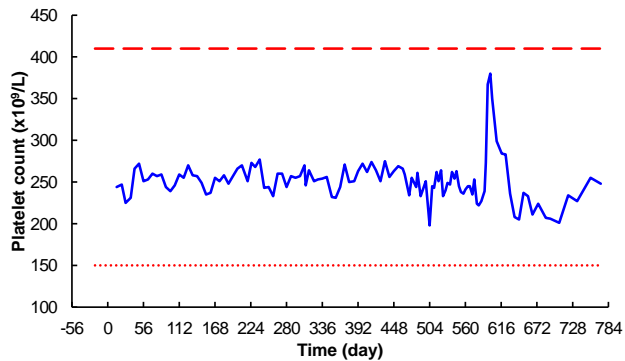**C Neutrophil count**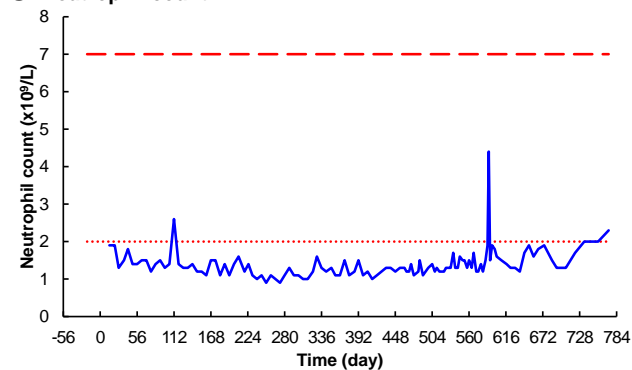**D Lymphocyte count**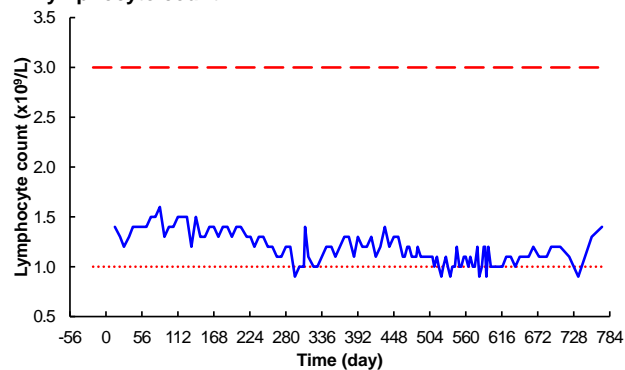

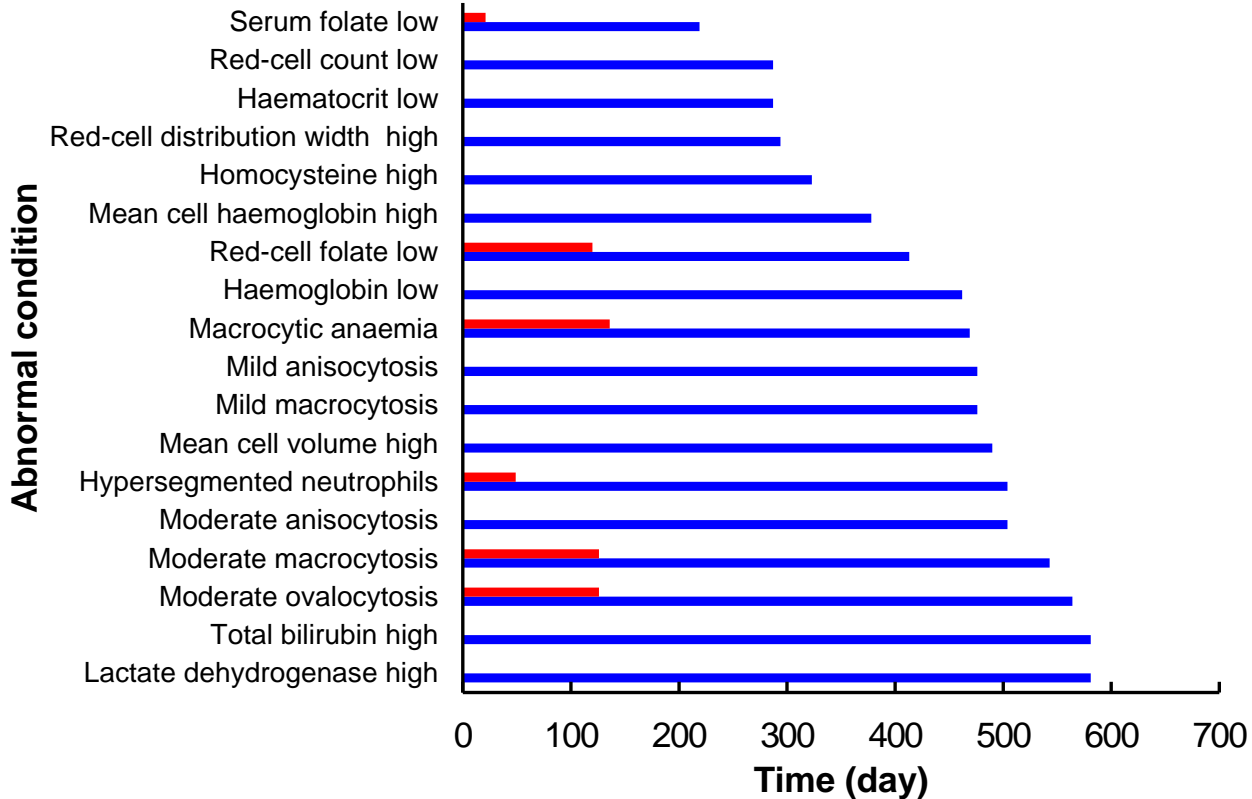

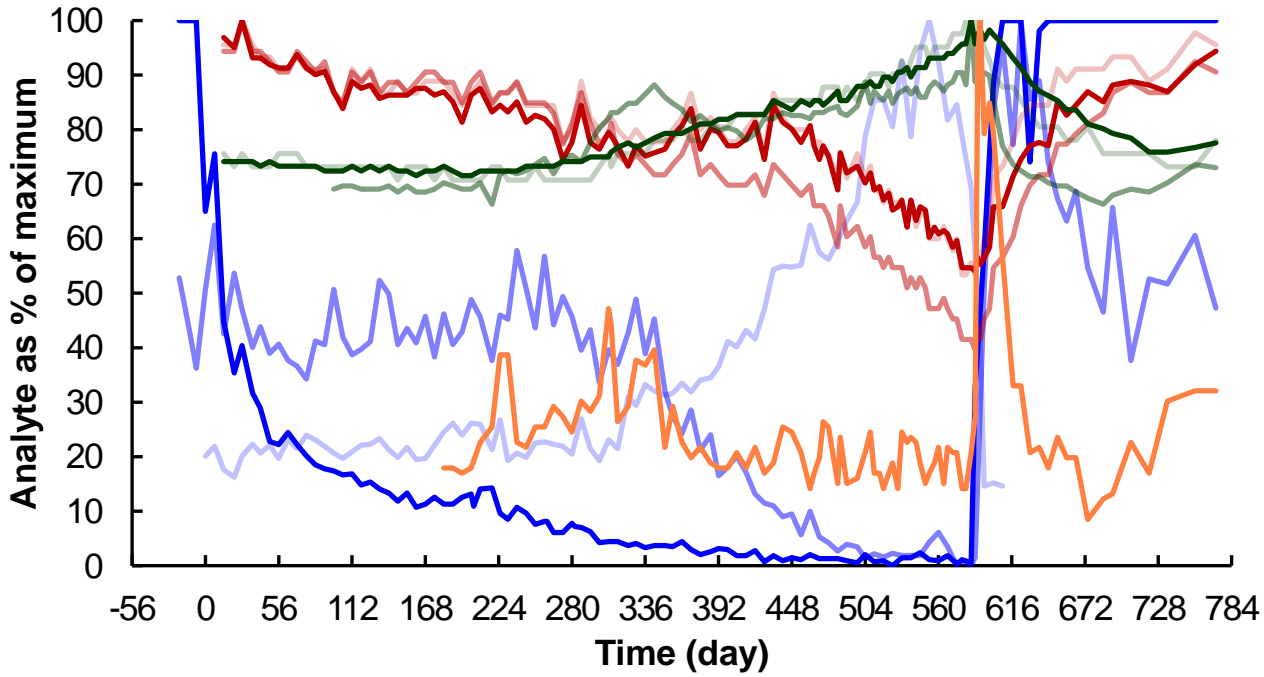

— Serum Folate  
 — Haemoglobin  
 — Mean Cell Volume  
 — Reticulocyte Count

— Red-Cell Folate  
 — Red-Cell Count  
 — Red-Cell Distribution Width

— Serum Homocysteine  
 — Haematocrit  
 — Mean Cell Haemoglobin
